1 **Divergent paths to seizure-like events.**

2 Neela K. Codadu<sup>1</sup>, Robert Graham<sup>1</sup>, Richard J. Burman<sup>2</sup>, R. Thomas Jackson-Taylor<sup>1</sup>, Joseph  
3 V. Raimondo<sup>2</sup>, Andrew J. Trevelyan<sup>1\*</sup>, and R. Ryley Parrish<sup>1\*</sup>

4 <sup>1</sup>Institute of Neuroscience, Medical School, Framlington Place, Newcastle upon Tyne, NE2  
5 4HH, UK.

6 <sup>2</sup>Division of Cell Biology, Department of Human Biology, Neuroscience Institute and Institute  
7 of Infectious Disease and Molecular Medicine, Faculty of Health Sciences, University of Cape  
8 Town, Cape Town, South Africa

9 \* Corresponding authors: R Ryley Parrish (email: [ryley.parrish@ncl.ac.uk](mailto:ryley.parrish@ncl.ac.uk))

10 Andrew J Trevelyan (email: [andrew.trevelyan@ncl.ac.uk](mailto:andrew.trevelyan@ncl.ac.uk))

11 Short title: Divergent paths to seizures

12 Key words: Epilepsy, seizure, interneurons,

13 Table of contents category:

14 Pages:            Tables: 1            Figures: 9

15 Abbreviations:

16 PV    Parvalbumin

17 SST   Somatostatin

18 ACSF   artificial cerebro-spinal fluid

19 SLE   seizure-like events

20 LRD   late recurrent discharges

21

1 **Abstract:**

2 **Aim:** Much debate exists about how the brain transitions into an epileptic seizure. One  
3 source of confusion is that there are likely to be critical differences between experimental  
4 seizure models. To address this, we compared the evolving activity patterns in two, widely  
5 used, *in vitro* models of epileptic discharges.

6 **Methods:** We compared brain slices, prepared in the same way from young adult mice,  
7 that were bathed either in 0 Mg<sup>2+</sup>, or 100μM 4AP, artificial cerebrospinal fluid.

8 **Results:** We find that while local field potential recordings of epileptiform discharges in  
9 the two models appear broadly similar, patch-clamp analysis reveals an important  
10 difference in the relative degree of glutamatergic involvement. 4AP affects parvalbumin-  
11 expressing interneurons more than other cortical populations, destabilizing their resting  
12 state and inducing spontaneous bursting behavior. Consequently, the most prominent  
13 pattern of transient discharge (“interictal event”) in this model is almost purely  
14 GABAergic, although the transition to seizure-like events (SLEs) involves pyramidal  
15 recruitment. In contrast, interictal discharges in 0 Mg<sup>2+</sup> are only maintained by a very  
16 large glutamatergic component that also involves transient discharges of the interneurons.  
17 Seizure-like events in 0 Mg<sup>2+</sup> have significantly higher power in the high gamma  
18 frequency band (60-120Hz) than these events do in 4AP, and are greatly delayed in onset  
19 by diazepam, unlike 4AP events.

20 **Conclusions:** The 0 Mg<sup>2+</sup> and 4AP models display fundamentally different levels of  
21 glutamatergic drive, demonstrating how ostensibly similar pathological discharges can  
22 arise from different sources. We contend that similar interpretative issues will also be  
23 relevant to clinical practice.

24

25 **Introduction**

26 Understanding how seizures develop and spread through cortical tissue is of great clinical  
27 importance. About 65 million people worldwide are diagnosed as having epilepsy, and many

1 others will experience a seizure at some point in their life <sup>1,2</sup>. There remain, however, many  
2 unresolved issues regarding the basic mechanisms leading to a seizure. Efforts to derive  
3 overarching principles regarding epileptic pathophysiology must take into account the key  
4 differences between patient phenotypes or between experimental models. Early studies of  
5 disinhibited networks showed that, without GABAergic restraint, epileptic discharges could be  
6 entrained from single neurons <sup>3</sup>. This work further provided a detailed, ionic model of the  
7 paroxysmal depolarising shift <sup>4</sup>. The disinhibition models show what can happen with a deficit  
8 of GABAergic activity, but cannot address how interneuronal activity might shape epileptic  
9 activity. Interneuronal function, on the other hand, has been a dominant theme in studies where  
10 epileptic activity is induced either by bathing the tissue in 0 Mg<sup>2+</sup> <sup>5-7</sup> or in 4-aminopyridine  
11 (4AP) <sup>8-10</sup> ACSF.

12 In the 0 Mg<sup>2+</sup> model, the primary cellular effect is to remove the voltage dependent  
13 blockade of NMDA receptors<sup>11</sup>, thereby greatly enhancing the postsynaptic effect of any  
14 glutamatergic synaptic inputs<sup>11</sup>. In contrast, the primary effect of 4AP is to block certain  
15 classes of voltage dependent K<sup>+</sup> channels. In both cases, the direct pharmacological actions  
16 occur rapidly (seconds to minutes), and yet epileptiform activity evolves on a rather slower  
17 timescale, over many minutes to hours, suggestive that there are emergent network alterations  
18 in each model that are critical for ictogenesis. An added appeal of the 4AP model is that it can  
19 be applied *in vivo* <sup>12-14</sup>, producing ostensibly similar discharges to the *in vitro* activity patterns.  
20 Both *in vivo* and *in vitro* 4AP models have been used to good effect in tandem with optogenetic  
21 stimulation of specific subpopulations of neurons, indicating how in this special case,  
22 interneurons may drive ictogenesis <sup>15-18</sup>. This is hypothesized to happen through a sequence  
23 involving chloride-loading of pyramidal cells and secondary rises in extracellular K<sup>+</sup> via the  
24 potassium chloride cotransporter (KCC2) <sup>19-22</sup>.

25 In contrast, the 0 Mg<sup>2+</sup> model can only be used *in vitro* (it is harder to remove ions than it  
26 is to add a drug), but it, too, involves intense bursts of interneuronal activity <sup>23-25</sup>, and evidence  
27 of short-term changes in GABAergic function <sup>26,27</sup>. Although, unlike the 4AP model, the  
28 interneuronal activity initially appears to act as a restraint on the spreading epileptiform  
29 discharges <sup>28,29</sup>. It is important to resolve these two contrasting views of the role of the

1 interneuronal bursting. We hypothesized that the explanation may lie in the level of concurrent  
2 glutamatergic drive in the two models. We therefore made a detailed comparison of activity  
3 patterns in these two models, using brain slices prepared in the same way from young adult  
4 mice.

5

## 6 **Methods:**

7 **Ethical Approval:** All animal handling and experimentation were done according to the  
8 guidelines laid by the UK Home Office and Animals (Scientific Procedures) Act 1986 and  
9 approved by the Newcastle University Animal Welfare and Ethical Review Body (AWERB #  
10 545).

11 **Slice preparation:** Male and female Emx1-Cre (B6.129S2-Emx1tm1<sup>(cre)</sup>Krj/J; Jackson  
12 Laboratory stock number 5628), PV-Cre (B6;129P2-Pvalb<sup><tm1(cre)</sup>Arbr>/J; Jackson  
13 Laboratory stock number 8069), and SOM-Cre (B6N.Cg.Ssttm2.1<sup>(cre)</sup>Zjh/J; Jackson  
14 Laboratory stock number 18973) mice and C57/B6 mice (ages 3 – 12 weeks) were used in this  
15 study. Transgenic mice were back-crossed with the C57/B6 line maintained at Newcastle  
16 University, and subsequently maintained on this C57/B6 background (Jackson Laboratory stock  
17 number 000664). Mice were housed in individually ventilated cages in a 12 hours light, 12  
18 hours dark lighting regime. Animals received food and water *ad libitum*. Mice were sacrificed  
19 by cervical dislocation, brains removed and stored in cold cutting solution (in mM): 3 MgCl<sub>2</sub>;  
20 126 NaCl; 26 NaHCO<sub>3</sub>; 3.5 KCl; 1.26 NaH<sub>2</sub>PO<sub>4</sub>; 10 glucose. For local field potential (LFP)  
21 recordings, 400µm horizontal sections were made, using a Leica VT1200 vibratome (Nussloch,  
22 Germany). Slices were then transferred to an interface holding chamber and incubated for 1-2  
23 hours at room temperature in artificial CSF (ACSF) containing (in mM): 2 CaCl<sub>2</sub>; 1 MgCl<sub>2</sub>; 126  
24 NaCl; 26 NaHCO<sub>3</sub>; 3.5 KCl; 1.26 NaH<sub>2</sub>PO<sub>4</sub>; 10 glucose. For patch clamp experiments, coronal  
25 sections were made at 350µm, and stored in a submerged holding chamber for 1–4 hours prior  
26 to experimentation. All the solutions were bubbled continuously to saturate with carboxygen  
27 (95% O<sub>2</sub> and 5% CO<sub>2</sub>).



1 **Extracellular field recordings** were performed using interface recording chambers. Slices  
2 were placed in the recording chamber perfused with modified artificial cerebrospinal fluid  
3 (ACSF) to induce epileptiform activity (0 Mg<sup>2+</sup> or 100μM 4-aminopyrimidine). Recordings  
4 were obtained using normal ACSF-filled 1-3MΩ borosilicate glass microelectrodes (GC120TF-  
5 10; Harvard Apparatus, Cambridge, UK) placed in deep layers of neocortex. Experiments were  
6 performed at 33-36°C. The solutions were perfused at the rate of 3.5mls/min. Waveform signals  
7 were acquired using BMA-931 biopotential amplifier (Dataq Instruments, Akron, OH, USA),  
8 Micro 1401-3 ADC board (Cambridge Electronic Design, Cambridge, UK) and Spike2  
9 software (v7.10, Cambridge Electronic Design). Signals were sampled at 10kHz, amplified  
10 (gain: 500) and bandpass filtered (1-3000Hz). CED4001-16 Mains Pulser (Cambridge  
11 Electronic Design) was connected to the events input of CED micro 1401-3 ADC board and is  
12 used to remove 50Hz hum offline. SLEs were visually identified with their start time as the  
13 time of occurrence of high-frequency rhythmic bursts (tonic-phase) associated with high-  
14 frequency signals, and the events were considered to end when the interval between two after-  
15 discharges (clonic-phase) is ≥ 2s. Frequency analysis of the recordings were performed using a  
16 custom-written code in Matlab2018b (MathWorks, Natick, MA, USA).

17 **Viral injections:** PV-Cre and SOM-Cre, or Emx1-Cre pups were injected with  
18 AAV5.Syn.Flex.tdTomato, purchased from the University of Pennsylvania vector core.  
19 Injections were performed either on the day of birth, or the following day. Pups were set on a  
20 stereotaxic frame and anesthetized with isoflurane, following application of EMLA cream  
21 (2.5% lidocaine and 2.5% prilocaine) to the left top of their head. Injections were made, using a  
22 10μl Hamilton syringes with a bevelled 36-gauge needle (World Precision Instruments,  
23 Sarasota, FL, USA), unilaterally into the lateral ventricle and overlying cortical plate, at about 1  
24 mm anterior to lambda and 1 mm lateral to the midline into the left hemisphere, starting at 1.7  
25 mm deep from the top of the dura mater, for a total of four separate 50nl injections, deepest first  
26 and coming up 0.3 mm for each subsequent injection. Approximately 200nl (~1000 viral  
27 particles) were injected into the left hemisphere over a 10 minute period. Pups were monitored  
28 until they awoke following the procedure and then returned to their home cage. These neonatal  
29 injections produced widespread cortical expression of tdTomato into the neurons of interest.

1 **Patch-clamp recordings:** Slices were perfused at 3-5mls/min and heated to 33-34°C. Whole  
2 cell data were acquired using pClamp software, Multiclamp 700B, and Digidata acquisition  
3 board (Molecular Devices, Sunnyvale, CA, USA). Whole cell recordings of layer 5 neurons  
4 were made using 4-7M $\Omega$  pipettes. Pipettes were filled with a KMeSO<sub>4</sub>-based internal solution  
5 containing (mM): 125 KMeSO<sub>4</sub>, 6 NaCl, 10 HEPES, 2.5 Mg-ATP, 0.3 Na<sub>2</sub>-GTP. For the  
6 voltage clamp recordings, 5mM QX-314 (N-(2,6-dimethylphenylcarbamoylmethyl) was added  
7 to the internal solution to block action potential firing while the cells were held at -30mV.  
8 Osmolarity and pH of all the internal solutions used were adjusted to 284mOsm and 7.4. The  
9 targeted patch experiments of the PV-interneurons, SST-interneurons, and pyramidal neurons  
10 were done in current clamp mode, with the cells being identified by the presence of tdTomato.  
11 The fluorescence was visualized using an Olympus DSU spinning disk BX/50WI upright  
12 microscope (UMPlanFL N 20x, 0.5 NA objective; Olympus, UK), illuminated using a Mercury  
13 arc lamp, controlled with a fast Sutter shutter (Sutter Instrument, USA), using the standard  
14 Olympus rhodamine (U-MRFPHQ) filter set. The system utilizes a Hamamatsu C9100 EM  
15 camera (Hamamatsu Photonics, Japan) to collect images, run by Simple PCI software (Digital  
16 Pixel, UK) installed on Dell Precision computers (Dell, UK). Patch clamp data was analysed  
17 using custom-written codes in Matlab2018b. Briefly, epileptiform discharges were identified  
18 from the voltage clamp recordings and classified automatically. In short, the events  
19 immediately prior to seizures, occurring at ~1-2Hz, and progressing straight into a full SLE, are  
20 referred to as “preictal events”. Other transient discharges (<500ms duration) which occur at a  
21 much lower rate (~0.1Hz) are referred to as “interictal events” (note that these also include  
22 events prior to the first SLE, even though as such, these events are not “inter”-ictal). Trace  
23 deflections fitting a generalised model were grouped by their structure as excitatory only,  
24 inhibitory only. All events were considered for the composite category and were recategorised  
25 only if they displayed bidirectional deflections with respect to a dynamically calculated  
26 baseline.

### 27 **Pharmacology:**

28 Drugs acting at glutamatergic and GABAergic receptors were used at the following  
29 concentrations: 50 $\mu$ M D-2-amino-5-phosphonovalerate (AP5); 20 $\mu$ M NBQX disodium salt

1 (Hello Bio, Bristol, UK); 10 $\mu$ M Gabazine (Hello Bio, Bristol, UK); 3 $\mu$ M Diazepam (Tocris,  
2 Abingdon, UK); 5 $\mu$ M CPG-55845.

### 3 **Data Analysis and Statistics:**

4 Data were analysed offline using Matlab R2018b (MathWorks, USA). Groups of two were  
5 analysed using the Mann-Whitney test or Student's t-test. A Kruskal-Wallis test followed by a  
6 Dunn's multiple comparison test was used for data with 3 or more groups. Proportion data was  
7 analysed with a Chi-square test. Significance was set at  $P \leq 0.05$  for all analyses.

8

### 9 **Results:**

#### 10 **Superficial similarities between 0 Mg<sup>2+</sup> and 4AP induced epileptiform activity.**

11 Brain slice preparations have long been used to understand how epileptic discharges are  
12 manifest in cortical networks. We compared the neocortical activity patterns that occur in two  
13 widely used models, induced by bathing brain slices in either 0 Mg<sup>2+</sup> or 100 $\mu$ M 4-  
14 aminopyridine (4AP) artificial cerebrospinal fluid (ACSF). Both models induce an evolving  
15 pattern of interictal and seizure-like activity, in neocortex, eventually progressing into a pattern  
16 of rhythmic epileptiform discharges, termed late recurrent discharges (LRDs), that has been  
17 likened to status epilepticus (Figure 1Ai, Aii) <sup>6,30</sup>. The time to the first full ictal event and time  
18 to the LRD in 4AP is significantly shorter than in 0 Mg<sup>2+</sup> but otherwise, the activity patterns  
19 appear broadly similar (Figure 1B-E).

20 Extracellular recordings, however, are rather abstracted representations of the  
21 underlying activity, and so while they clearly have a large informational content, the underlying  
22 neuronal causes of the signal often remains rather cryptic. We therefore explored the two  
23 models using patch-clamp recordings of pyramidal cells (Figure 2). Large, layer 5 pyramidal  
24 cells have dendritic trees that extend through the full depth of the cortex, meaning that  
25 recordings from these cells provide a good sampling of synaptic drives onto a cortical column.  
26 We recorded 19 pyramidal cells (10 cells in 0 Mg<sup>2+</sup>; 9 cells in 4AP) in voltage clamp, holding  
27 the cells at -30mV, roughly halfway between the reversal potential of glutamatergic and  
28 GABAergic receptors. This approach had previously proved highly informative about the

1 pattern of synaptic bombardment during spreading ictal events<sup>23</sup>. In 4AP, most early interictal-  
2 like discharges were manifest as entirely upward deflections, suggestive of an overwhelming  
3 preponderance of GABAergic activity. In contrast, the majority of 0 Mg<sup>2+</sup> events showed  
4 prominent downward deflections, indicative of large glutamatergic drive. The two models were  
5 highly significantly different (Figure 2Aii, Bii). These same patterns were replicated in the  
6 events immediately prior to ictal events (pre-ictal activity; Figure 3Ai, Bi), and which likewise  
7 showed a highly significant difference in the level of glutamatergic drive in the two models  
8 (Figure 3Aii, Bii). Taken together, these data demonstrate that despite the ostensible LFP  
9 similarities, there are important differences between the models, particularly in the pattern of  
10 synaptic drive onto the pyramidal cell population, suggesting that different cell populations may  
11 drive the generation of pathological discharges in the two models.

12 We next examined the source of the ictal-like activity through pharmacological dissection  
13 of the glutamatergic and GABAergic components of the network. As expected, application of  
14 AMPA and NMDA receptor blockers resulted in the abolishment of all interictal and ictal-like  
15 activity in the 0 Mg<sup>2+</sup> model (Figure 4A). In contrast, in the 4AP model, application of  
16 glutamate receptor blockers only blocked the ictal-like activity, but interictal activity persisted,  
17 as has been previously reported<sup>10,31</sup>. This interictal activity was eliminated through the  
18 application of the of GABA<sub>A</sub> receptor blocker gabazine (Figure 4B), strongly suggesting that  
19 this remaining epileptiform activity is due to post-synaptic IPSCs onto the pyramidal cells<sup>10</sup>.  
20 This demonstrates that while seizure-like events in both models are downstream of glutamate  
21 receptors activation, the source of the interictal activity is fundamentally different between the  
22 two models.

### 23 **4AP preferentially activates PV interneurons**

24 In order to understand the source of the persistent epileptiform activity in the 4AP model,  
25 we examined the direct effects of 4AP on firing patterns in the three main classes of neocortical  
26 neurons: pyramidal cells, and both parvalbumin-expressing (PV), and somatostatin-expressing  
27 (SST) interneurons. Recordings were performed in the absence of any fast synaptic  
28 neurotransmission (glutamatergic blockade: 20μM NBQX and 50μM AP5; GABAergic  
29 blockade: 10μM gabazine and 5μM CPG-55845). 4AP induced spontaneous action potential

1 firing in all cell classes studied (Figure 5A), but the effect on PV-interneurons was larger than  
2 on the other two cell classes (Figure 5B). Consistent with this finding, 4AP application had no  
3 appreciable effect on the resting membrane potential, or input resistance, of either pyramidal  
4 cells or SST interneurons, but it induced a highly significant increase in the input resistance of  
5 PV interneurons (Table 1). Additionally, 4AP reduced action potential threshold in both PV  
6 and pyramidal cells (but not SST interneurons), but this only translated into an increase in the  
7 evoked firing (triggered by a 100pA current injection) in PV interneurons, but not in the  
8 pyramidal cells (Table 1; Figure 5D; 6B). 4AP further caused a highly significant broadening  
9 of action potentials in all cell classes, although the effect was much larger in the interneuronal  
10 classes (84% and 104% increase in PV and SST interneurons respectively, but only 18%  
11 increase for pyramidal cells, Figure 6A;Table 1).

12 We concluded that 4AP affects PV-interneuron firing more than it does SST and  
13 pyramidal firing, leading to a preferential activation of the PV cell class. PV interneurons are,  
14 thus, likely to be the main source of the persistent pathological discharges following application  
15 of glutamate receptor blockers, in this model. We therefore performed targeted, cell-attached  
16 patch clamp recordings of the PV interneuron population during spontaneous interictal events in  
17 the two models (no glutamatergic blockade). We found that while the mean and maximal firing  
18 rates during these interictal bursts were comparable in the two models, these bursts of firing  
19 lasted approximately twice as long in the 4AP events and comprised roughly three times as  
20 many action potentials per event (Figure 7).

21 We next analysed prolonged extracellular recordings of 22 brain slices bathed in 4AP and  
22 24 slices bathed in 0 Mg<sup>2+</sup>, to investigate whether the difference in glutamatergic involvement  
23 between the models was evident in the local field potential. To control for differences in the  
24 electrode quality, we normalised the traces to the maximal field deflection during full ictal  
25 events, since we reasoned that these are likely to reflect comparable levels of network  
26 activation in the two models. In each model, in almost identical proportions, we found  
27 instances of both low voltage, fast onset, (0 Mg<sup>2+</sup> model 43% of events; 4AP, 44% of events)  
28 and hypersynchronous onset (0 Mg<sup>2+</sup>, 57% of events; 4AP, 56% of events). A power spectra  
29 analysis over the entire ictal events indicated that there was a significant excess power at

1 frequencies in the high gamma range in the 0 Mg<sup>2+</sup> (Figure 8). This excess power observed in  
2 the 0 Mg<sup>2+</sup> model extended also into the fast ripple range (250 to 500 Hz, data not shown).  
3 Another notable difference between the models is that the post-ictal refractory period lasted far  
4 longer in 0 Mg<sup>2+</sup> (time delay after the first seizure, before the resumption of interictal  
5 discharges = 106 ± 67s; n = 24 brain slices) compared with that in 4-AP (post-ictal delay = 25 ±  
6 50s; n = 22; p = 3.0e-5).

### 7 **The 0 Mg<sup>2+</sup> and 4AP models differ in their sensitivity to diazepam.**

8 Finally, we examined whether there were differences in sensitivity to the benzodiazepine  
9 family of drugs between the models as a result of their different drives. We found that bath  
10 application of diazepam significantly delayed the onset of the SLE and increased the duration of  
11 the early interictal period in the 0 Mg<sup>2+</sup> model, while having no effect in the 4AP model (Figure  
12 9A-D). Additionally, in the 0 Mg<sup>2+</sup> model, the number and rate of early interictal-like events  
13 were greatly increased by diazepam. In contrast, diazepam affected neither in 4AP (Figure 9E,  
14 F). These data further suggest that these models produce epileptiform activity by different  
15 mechanisms and serve to illustrate how important it is to understand the source of epileptiform  
16 activity, when considering how to manage it.

17

### 18 **Discussion:**

19 In this study, we made side-by-side comparisons of *in vitro* epileptiform activity induced  
20 either by bathing in 0 Mg<sup>2+</sup> ACSF, or in 100μM 4AP. Brain slices were prepared in the same  
21 way (often from the same animals), from young, adult mice. We showed previously that the  
22 two models affect hippocampal and neocortical areas differently<sup>32</sup> (note that the entorhinal  
23 cortex appears to align with neocortical activity, rather than the hippocampal circuitry, in this  
24 regard), with the hippocampal territories being activated early in 4AP, but very late in 0 Mg<sup>2+</sup>.  
25 Here we focused on neocortical activity patterns, and showed that 4AP has an especially strong  
26 effect on PV-expressing interneurons (although it also alters, to a lesser extent, activity in both  
27 SST-expressing interneurons and pyramidal cells), triggering spontaneous bursting in these  
28 cells (similar results have also been reported by Williams and Hablitz<sup>33</sup>). These bursts are

1 readily apparent as isolated short-lasting (<1s) discharges in the LFP. Similar duration  
2 discharges are also seen in 0 Mg<sup>2+</sup> ACSF, and both are commonly referred to by the same term,  
3 “interictal events” and we have shown previously that these interictal events involve PV cell  
4 firing in both models<sup>34</sup>. A more detailed examination using patch-clamp recordings of  
5 pyramidal cells, however, reveal a notable difference between these discharges: the 4AP events  
6 are almost purely inhibitory, whereas the 0 Mg<sup>2+</sup> events also have a large glutamatergic  
7 component. This difference is also apparent in the preictal bursts.

8 It has been reported, previously, that the 4AP *in vitro* model induces low voltage fast  
9 onset seizure types<sup>17</sup>. We therefore investigated whether the two models showed different onset  
10 patterns, but found instead that both models displayed the low voltage fast onset pattern about  
11 50% of the time, and were just as likely to display a hypersynchronous onset pattern. The  
12 variability may be in the proximity to the “ictal focus” within the slice, such that some  
13 recordings are of the ictogenic process, whereas others are of the secondary generalization, but  
14 the key point is that both models show this heterogeneity. 0 Mg<sup>2+</sup> seizure-like events showed  
15 significantly higher power at frequencies above 60Hz, and far more protracted post-ictal  
16 suppression, relative to 4AP events. Indeed, in many slices bathed in 4AP, the interictal  
17 discharges resume almost immediately.

18 We also found a marked difference in the drug sensitivity of the two models:  
19 benzodiazepines (Figure 9) have little effect on the evolving activity in 4AP, but markedly  
20 reduce the early activity and the time to first seizure-like events in 0 Mg<sup>2+</sup>. Consistent with  
21 this, other groups have noted that persistent epileptiform bursting leads to a reduced sensitivity  
22 of neurons to diazepam<sup>35-38</sup>. Notably, previous work showed that gap-junction blockers also  
23 affect the two models differently, giving mixed results appearing to enhance<sup>39</sup> activity in 0  
24 Mg<sup>2+</sup>, but suppressing 4AP induced activity<sup>40,41</sup>.

25 These varied differences between the experimental models provide a powerful research  
26 tool for investigating epileptic phenotypes or drug actions in rodent tissue. In transgenic mice  
27 carrying mutations associated with epilepsy, it can often be hard to fathom exactly where in the  
28 network the problem arises. These acute models though provide a means of “stress-testing” the  
29 network<sup>42</sup>, which may help highlight, for instance, whether the problem is primarily neocortical



1 or hippocampal in origin, or to what extent it involves interneuronal dysfunction, and in what  
2 way.

3 A key lesson from these studies is that superficial similarities between epileptiform  
4 activity patterns, especially when viewed only using analyses of field potentials, can conceal  
5 important differences in the underlying cellular and network activity. This is of obvious clinical  
6 importance, since field potentials, most of which are not even ‘local’, but rather surface or scalp  
7 EEG, are the only clinical electrophysiological recordings available to us. That is not to say  
8 such recordings are worthless, because they clearly do contain huge amounts of information,  
9 but we still have much to learn about how to access this for clinical use.

10 A major motivation behind our study was the important work elucidating ictogenesis in  
11 the 4AP model, aided by the development of optogenetic strategies for uniquely activating, or  
12 suppressing activity in, specific subpopulations of neurons. Both techniques are compatible  
13 with *in vivo* studies, resulting in a large upsurge in the use of 4AP to induce epileptiform  
14 activity acutely. It is important therefore to understand how this model gives rise to seizure-like  
15 activity, and further, what commonalities, or differences, exist between this model and others.  
16 A growing consensus points to a critical role for short-term ionic plasticity affecting  
17 particularly fast GABAergic synaptic function (reviewed in <sup>27</sup>, but see also <sup>22,26,43,44</sup>). This is  
18 exacerbated by other causes of raised intracellular chloride, more chronically<sup>45,46</sup>. On this  
19 background of raised  $[Cl^-]_i$ , bursts of interneuronal activity will excite the most extreme loaded  
20 pyramidal cells<sup>33</sup>, and will further load other cells with chloride acutely. Moreover, this raised  
21 intracellular  $Cl^-$  then causes a secondary surge in extracellular  $[K^+]_o$ , due to coupled extrusion of  
22  $Cl^-$  and  $K^+$  mediated by  $KCC2$ <sup>22</sup>.

23 Specific optogenetic activation of interneurons has been shown to trigger SLEs, albeit not  
24 invariably, in 4AP<sup>15,17,18,47</sup> and in the LRD phase of the  $0\text{ Mg}^{2+}$  model<sup>15</sup>. Critically, though, this  
25 does not occur early in the  $0\text{ Mg}^{2+}$  model<sup>48</sup>, when SLEs still occur, when GABAergic function  
26 remains inhibitory and exercises a marked restraint on propagating epileptiform discharges<sup>23</sup>.  
27 This restraint is powerful, but also short-lived<sup>23,26,49</sup>, since its enactment provides one of the  
28 most rapid means of driving  $Cl^-$  into neurons, on account of the massive, and concurrent,  
29 GABAergic and glutamatergic synaptic drive<sup>26,28,29,49,50</sup>. Thus these early SLEs in the  $0\text{ Mg}^{2+}$



1 also involve a progressively compromised GABAergic function arising from short-term ionic  
2 plasticity. This then is the nub of the difference between the two models, that in the absence of  
3 appreciable glutamatergic drive, spontaneous or induced interneuronal activity can trigger SLEs  
4 through an extreme form of GABAergic dysfunction, involving raised intracellular  $\text{Cl}^-$  and  
5 extracellular  $\text{K}^+$ . Notably, a recent study of an acute, in vivo model, triggered by direct  
6 injection of pilocarpine into neocortex, showed the rapid switch, occurring over a few seconds,  
7 of the inhibitory effect of PV-interneuron activation to an excitatory one<sup>51</sup>, consistent with the  
8 previous demonstration in organotypic cultures<sup>26</sup>. They further showed that this GABAergic  
9 switch could be prevented by over-expressing KCC2 artificially (introduced by viral vectors),  
10 providing strong support for the hypothesized role of short-term ionic plasticity in ictogenesis<sup>51</sup>.

11 Critically, though, in the presence of large glutamatergic drives, ictal recruitment will  
12 occur at a far earlier stage in this spectrum of GABAergic dysfunction. It remains an open  
13 question for clinical practice which of these two situations is dominant, but one can conceive  
14 examples of both. For instance, sensory-triggered seizures, and secondary generalization into  
15 cortical areas that had been functioning normally, are both likely to represent cases where the  
16 glutamatergic drive is predominant. Optogenetic stimulation of interneurons is an important  
17 experimental model, but the key clinical question is whether there are pathological conditions in  
18 which one sees spontaneous bursting of interneurons, in the absence of any significant  
19 glutamatergic drive. Of course, there could be special clinical cases of this, for instance, such as  
20 with genetic mutations of certain classes of  $\text{K}^+$  channels that are expressed predominantly in  
21 interneurons<sup>48,52-54</sup>. Any EEG marker of such activity would represent an important means of  
22 identifying patients at high risk of having a seizure. Furthermore, a clinical understanding of  
23 the source of the epileptiform discharges (presence or absence of appreciable glutamatergic  
24 drive) is likely to have relevance for determining the most appropriate pharmacological  
25 interventions for individual patients.

## 26 **Funding**

27 The work was supported by project grants from Epilepsy Research UK (P1504) and  
28 Medical Research Council (UK) (MR/J013250/1 and MR/R005427/1).

1 **Author contributions**

2 Experiments and data analysis were performed by NKC, RG, TJ, RJB and RRP.  
3 Experiments were conceived by NKC, AJT, JVR, and RRP. Manuscript was written by RRP  
4 and AJT, and edited by the other authors. All authors have approved the final manuscript and  
5 agree to be accountable for all aspects of the work. All authors qualify for authorship, and all  
6 who qualify for authorship are listed.

7 **Competing interests**

8 The authors declare no conflict of interest.

9 **Acknowledgements**

10 We would like to thank Meribeth Parrish and Claudia Racca for comments on the manuscript.

11

12 **Figure legends:**

13 **Figure 1. Similarities between evolving epileptiform activity, in 0 Mg<sup>2+</sup> and 4AP ACSF.**

14 Ai) Example trace from 0 Mg<sup>2+</sup> induced epileptiform activity. Aii) Equivalent recording in 4AP.  
15 B) The 4AP model leads to SLE significantly faster than the 0 Mg<sup>2+</sup> model (Mann-Whitney test,  
16 \*\*p = 0.0017). C) There is no difference between the duration of seizures between the 4AP and  
17 0 Mg<sup>2+</sup> models (Mann-Whitney test, p = 0.1733). D) There is no difference in the number of  
18 SLE between the 4AP and 0 Mg<sup>2+</sup> models (Mann-Whitney test, \*\*\*p = 0.0002). E) The 4AP  
19 model enters LRD significantly earlier than the 0 Mg<sup>2+</sup> model (Mann-Whitney test, \*\*p =  
20 0.0050).

21 **Figure 2. Different levels of glutamatergic drive in early interictal-like events, in the two**

22 **models.** Ai) Example patch-clamp recording of typical early interictal-like events onto a layer 5  
23 pyramidal cell induced by washout of Mg<sup>2+</sup> ions (Cell is being held at -30 mV). Aii) Pie chart  
24 demonstrating the proportion of putative IPSCs (33.3%, represented with an upward blue  
25 arrow), EPSCs (42.3%, represented with a downward pink arrow), and composite events  
26 (events containing both a putative IPSC and an EPSC; 24.4%, represented with both an upward

1 blue arrow and a downward pink arrow) of early interictal-like postsynaptic currents onto  
2 pyramidal cells after washout of  $Mg^{2+}$  ions (4,002 events were analysed from 10 slices). Bi)  
3 Equivalent recording in 4AP as shown in Ai (Cell is being held at -30 mV). Bii) Pie chart  
4 demonstrating the proportion of putative IPSCs (87.0%, represented with an upward blue  
5 arrow), EPSCs (7.8%, represented with a downward pink arrow), and composite events (5.2%,  
6 represented with both an upward blue arrow and a downward pink arrow) of early interictal-like  
7 postsynaptic currents onto pyramidal cells after addition of 4AP (9,992 events were analysed  
8 from 9 slices, Proportion data from 4AP is significantly different from the 0  $Mg^{2+}$  paradigm,  $\chi^2$   
9 test,  $p < 0.0001$ ).

10 **Figure 3. Different levels of glutamatergic drive during preictal activity, in the two**  
11 **models.** Ai) Example patch-clamp recording of typical SLE induced by washout of  $Mg^{2+}$  ions  
12 (Cell is being held at -30 mV). Aii) Pie chart demonstrating the proportion of putative IPSCs  
13 (42.8%, represented with an upward blue arrow), EPSCs (27.0%, represented with a downward  
14 pink arrow), and composite events (events containing both a putative IPSC and an EPSC;  
15 30.2%, represented with both an upward blue arrow and a downward pink arrow) of preictal  
16 postsynaptic currents onto pyramidal cells after washout of  $Mg^{2+}$  (152 events were analysed  
17 from 10 slices). Bi) Equivalent recordings in 4AP as shown in Ai (Cell is being held at -30  
18 mV). Bii) Pie chart demonstrating the proportion of putative IPSCs (88.0%, represented with an  
19 upward blue arrow), EPSCs (7.0%, represented with a downward pink arrow), and composite  
20 events (5.0%, represented with both an upward blue arrow and a downward pink arrow) of  
21 preictal postsynaptic currents onto pyramidal cells after addition of 4AP (105 events were  
22 analysed from 9 slices, Proportion data from 4AP is significantly different from the 0  $Mg^{2+}$   
23 paradigm,  $\chi^2$  test,  $p < 0.0001$ ).

24 **Figure 4. 4AP interictal-like activity is sustained in the presence of glutamatergic blockers**  
25 **but not in the 0  $Mg^{2+}$  paradigm.** A) Representative LFP trace of a 0  $Mg^{2+}$  recording before  
26 and after addition of Glu-X (NBQX and AP5) and Glu-X plus Gabazine (N = 3). B) Equivalent  
27 recordings in 4AP (N = 3).

28 **Figure 5. 4AP preferentially induces increased action potential firing in the PV cell**  
29 **population compared to pyramidal and SST cells.** A) Spontaneous activity: representative

1 traces of a pyramidal cell, a PV-interneuron, and a SST-interneuron following wash in of  
2 100 $\mu$ M 4AP with Glutamate (NBQX and AP5) and GABA (Gabazine and CPG-55845)  
3 receptor blockers (N = 6). B) Spontaneous action potential firing in the PV cells is significantly  
4 higher than in the pyramidal or SST cells (Kruskal-Wallis Test with post-hoc test, \*\*p = 0.008  
5 for pyramidal vs PV, \*p = 0.042 for SST vs PV). C) Evoked activity: representative traces  
6 showing responses of Ci) a pyramidal cell, Cii) a PV interneuron, and Ciii) a SST interneuron  
7 to 3s long hyperpolarisation (-100pA) and depolarisation (100pA) current pulses, in the  
8 presence of 4AP (GABA and glutamatergic neurotransmission blocked). Scale bars: horizontal,  
9 500ms; vertical, 10mV. D) 4AP increased the number of action potentials fired by PV  
10 interneurons (Wilcoxon matched-pairs rank test, p = 0.008; N = 9) due to 100pA current  
11 injection, but not by pyramidal cells (paired t-test, p = 0.769; N = 6) or SST interneurons  
12 (Wilcoxon matched-pairs rank test, p = 0.125; N = 6).

13 **Figure 6. 4AP affects the firing properties in both PV- and SST-expressing interneurons,**  
14 **and also pyramidal cells.** Ai) 4AP significantly increased the action potential half-width of  
15 pyramidal cells (paired t-test, p = 0.033; N = 6). Inset: representative pyramidal cell action  
16 potential trace before (black) and after (green) 4AP. Scale bars: horizontal, 1ms; vertical,  
17 20mV. Aii) 4AP significantly increased the action potential half-width of PV interneurons  
18 (paired t-test, p < 0.0001; N = 9). Inset: representative PV interneuron action potential trace  
19 before (black) and after (orange) 4AP. Scale bars: horizontal, 1ms; vertical, 20mV. Aiii) 4AP  
20 significantly increased the action potential half-width of SST interneurons (paired t-test, p =  
21 0.002; N = 6). Inset: representative SST interneuron action potential trace before (black) and  
22 after (blue) 4AP. Scale bars: horizontal, 1ms; vertical, 20mV. Bi) 4AP significantly reduced the  
23 action potential threshold of pyramidal cells (paired t-test, p = 0.023; N = 6). Inset:  
24 representative phase plots of pyramidal cell action potential trace before (black) and after  
25 (green) 4AP. Bii) 4AP significantly reduced the action potential threshold of PV interneuron  
26 (paired t-test, p = 0.021; N = 9). Inset: representative phase plots of PV interneuron action  
27 potential trace before (black) and after (orange) 4AP. Biii) 4AP had no effect on the action  
28 potential threshold of SST interneuron (paired t-test, p = 0.159; N = 6). Inset: representative  
29 phase plots of SST interneuron action potential trace before (black) and after (blue) 4AP.

1

2 **Figure 7. PV firing during interictal events is more sustained in 4AP than in 0 Mg<sup>2+</sup>**

3 **events.** A) Example paired recordings of pyramidal cells (“Pyr”, recorded in whole cell (“wc”)

4 voltage-clamp mode at -30mV) and PV interneurons (recorded in cell-attached (“ca”) mode) in

5 0 Mg<sup>2+</sup>. Note the intense bursts of PV firing coincident with upwards deflections of the

6 pyramidal trace, consistent with the PV activity being the source of the GABAergic synaptic

7 barrages. B) Equivalent example paired recordings in 100μM 4AP. C) PV interneurons fire

8 significantly more action potentials per interictal event in 4AP than they do in 0 Mg<sup>2+</sup> (79

9 events from 6 slices analysed from the 0 Mg<sup>2+</sup> paradigm while 57 events from 4 slices were

10 analysed for the 4AP model; Mann-Whitney test, \*\*p = 0.0095). D) There is no difference in

11 the PV cell firing rates during interictal events between the models. E) Duration of interictal

12 events are longer in the 4AP model than in 0 Mg<sup>2+</sup> model (Mann-Whitney test, \*\*p = 0.0095).

13 **Figure 8. 0 Mg<sup>2+</sup> and 4AP SLEs differ in higher frequency power.** 0 Mg<sup>2+</sup> seizures display

14 more power in the higher frequency range than 4AP seizures (mean summed power 60-120Hz

15 (normalised traces), 0 Mg<sup>2+</sup> = 7.08e-7 ± 8.99e-7; 4-AP = 1.78e-7 ± 4.21e-7; p = 0.0155; 22 and

16 24 brain slices respectively).

17 **Figure 9. The 0 Mg<sup>2+</sup> model and the 4AP model differ in their sensitivity to diazepam.** A)

18 Representative LFP trace demonstrating the effect of diazepam on 0 Mg<sup>2+</sup> induced epileptiform

19 activity. B) Equivalent recording in 4AP. C) Diazepam significantly delays seizure-like events

20 in the 0 Mg<sup>2+</sup> model while have no effect on 4AP induced seizures (ANOVA with post-hoc test,

21 \*p = 0.001). D) Diazepam significantly increases the duration of the early interictal period in

22 the 0 Mg<sup>2+</sup> model while having no effect in 4AP (ANOVA with post-hoc test, \*p = 0.001). E)

23 Diazepam significantly increases the number of early interictal-like events in the 0 Mg<sup>2+</sup> model

24 while this remains unchanged in the 4AP (ANOVA with post-hoc test, \*p = 0.001). F)

25 Diazepam significantly increases the rate of early interictal-like events in the 0 Mg<sup>2+</sup> model

26 while having no effect on the 4AP induced early interictal-like events (ANOVA with post-hoc

27 test, \*p = 0.001).

28

## 1 References:

- 2 1. Sirven JI. Epilepsy: A Spectrum Disorder. *Cold Spring Harb Perspect Med*. 2015;5(9):a022848.
- 3 2. Jacoby A, Baker GA. Quality-of-life trajectories in epilepsy: a review of the literature. *Epilepsy*
- 4 *Behav*. 2008;12(4):557-571.
- 5 3. Miles R, Wong RK. Single neurones can initiate synchronized population discharge in the
- 6 hippocampus. *Nature*. 1983;306(5941):371-373.
- 7 4. Traub RD, Miles R. *Neuronal networks of the hippocampus*. Cambridge, UK: Cambridge
- 8 University Press; 1991.
- 9 5. Wong BY, Prince DA. The lateral spread of ictal discharges in neocortical brain slices. *Epilepsy*
- 10 *Res*. 1990;7(1):29-39.
- 11 6. Anderson WW, Lewis DV, Swartzwelder HS, Wilson WA. Magnesium-free medium activates
- 12 seizure-like events in the rat hippocampal slice. *Brain Res*. 1986;398(1):215-219.
- 13 7. Mody I, Lambert JD, Heinemann U. Low extracellular magnesium induces epileptiform activity
- 14 and spreading depression in rat hippocampal slices. *J Neurophysiol*. 1987;57(3):869-888.
- 15 8. Rutecki PA, Lebeda FJ, Johnston D. 4-Aminopyridine produces epileptiform activity in
- 16 hippocampus and enhances synaptic excitation and inhibition. *Journal of neurophysiology*.
- 17 1987;57(6):1911-1924.
- 18 9. Buckle PJ, Haas HL. Enhancement of synaptic transmission by 4-aminopyridine in hippocampal
- 19 slices of the rat. *The Journal of physiology*. 1982;326:109-122.
- 20 10. Avoli M, D'Antuono M, Louvel J, et al. Network and pharmacological mechanisms leading to
- 21 epileptiform synchronization in the limbic system in vitro. *Prog Neurobiol*. 2002;68(3):167-207.
- 22 11. Mayer ML, Westbrook GL, Guthrie PB. Voltage-dependent block by Mg<sup>2+</sup> of NMDA responses
- 23 in spinal cord neurones. *Nature*. 1984;309(5965):261-263.
- 24 12. Martin ED, Pozo MA. Valproate suppresses status epilepticus induced by 4-aminopyridine in
- 25 CA1 hippocampus region. *Epilepsia*. 2003;44(11):1375-1379.
- 26 13. Levesque M, Salami P, Behr C, Avoli M. Temporal lobe epileptiform activity following systemic
- 27 administration of 4-aminopyridine in rats. *Epilepsia*. 2013;54(4):596-604.
- 28 14. Fragoso-Veloz J, Tapia R. NMDA receptor antagonists protect against seizures and wet-dog
- 29 shakes induced by 4-aminopyridine. *Eur J Pharmacol*. 1992;221(2-3):275-280.
- 30 15. Chang M, Dian JA, Dufour S, et al. Brief activation of GABAergic interneurons initiates the
- 31 transition to ictal events through post-inhibitory rebound excitation. *Neurobiol Dis*.
- 32 2018;109(Pt A):102-116.
- 33 16. Magloire V, Mercier MS, Kullmann DM, Pavlov I. GABAergic Interneurons in Seizures:
- 34 Investigating Causality With Optogenetics. *Neuroscientist*. 2018:1073858418805002.
- 35 17. Shiri Z, Manseau F, Levesque M, Williams S, Avoli M. Interneuron activity leads to initiation of
- 36 low-voltage fast-onset seizures. *Ann Neurol*. 2015;77(3):541-546.
- 37 18. Yekhlief L, Breschi GL, Lagostena L, Russo G, Taverna S. Selective activation of parvalbumin- or
- 38 somatostatin-expressing interneurons triggers epileptic seizurelike activity in mouse medial
- 39 entorhinal cortex. *J Neurophysiol*. 2015;113(5):1616-1630.
- 40 19. Schevon CA, Tobochnik S, Eissa T, et al. Multiscale recordings reveal the dynamic spatial
- 41 structure of human seizures. *Neurobiology of disease*. 2019;127:303-311.
- 42 20. de Curtis M, Librizzi L, Uva L, Gnatkovsky V. GABAA receptor-mediated networks during focal
- 43 seizure onset and progression in vitro. *Neurobiology of disease*. 2019;125:190-197.

- 1 21. Gonzalez OC, Shiri Z, Krishnan GP, et al. Role of KCC2-dependent potassium efflux in 4-  
2 Aminopyridine-induced Epileptiform synchronization. *Neurobiology of disease*. 2018;109(Pt  
3 A):137-147.
- 4 22. Viitanen T, Ruusuvoori E, Kaila K, Voipio J. The K<sup>+</sup>-Cl<sup>-</sup> cotransporter KCC2 promotes GABAergic  
5 excitation in the mature rat hippocampus. *J Physiol*. 2010;588(Pt 9):1527-1540.
- 6 23. Trevelyan AJ, Sussillo D, Watson BO, Yuste R. Modular propagation of epileptiform activity:  
7 evidence for an inhibitory veto in neocortex. *J Neurosci*. 2006;26(48):12447-12455.
- 8 24. Trevelyan AJ, Sussillo D, Yuste R. Feedforward inhibition contributes to the control of  
9 epileptiform propagation speed. *J Neurosci*. 2007;27(13):3383-3387.
- 10 25. Parrish RR, Codadu NK, Scott CM, Trevelyan AJ. Feedforward inhibition ahead of ictal  
11 wavefronts is provided by both parvalbumin and somatostatin expressing interneurons. *J*  
12 *Physiol*. 2019.
- 13 26. Ellender TJ, Raimondo JV, Irlke A, Lamsa KP, Akerman CJ. Excitatory effects of parvalbumin-  
14 expressing interneurons maintain hippocampal epileptiform activity via synchronous  
15 afterdischarges. *J Neurosci*. 2014;34(46):15208-15222.
- 16 27. Raimondo JV, Burman RJ, Katz AA, Akerman CJ. Ion dynamics during seizures. *Frontiers in*  
17 *cellular neuroscience*. 2015;9:419.
- 18 28. Trevelyan AJ, Schevon CA. How inhibition influences seizure propagation. *Neuropharmacology*.  
19 2013;69:45-54.
- 20 29. Trevelyan AJ. Do Cortical Circuits Need Protecting from Themselves? *Trends Neurosci*.  
21 2016;39(8):502-511.
- 22 30. Dreier JP, Heinemann U. Regional and time dependent variations of low Mg<sup>2+</sup> induced  
23 epileptiform activity in rat temporal cortex slices. *Exp Brain Res*. 1991;87(3):581-596.
- 24 31. Bohannon AS, Hablitz JJ. Optogenetic dissection of roles of specific cortical interneuron  
25 subtypes in GABAergic network synchronization. *J Physiol*. 2018;596(5):901-919.
- 26 32. Codadu NK, Parrish RR, Trevelyan AJ. Region-specific differences and areal interactions  
27 underlying transitions in epileptiform activity. *J Physiol*. 2019;597(7):2079-2096.
- 28 33. Fujiwara-Tsukamoto Y, Isomura Y, Imanishi M, et al. Prototypic seizure activity driven by  
29 mature hippocampal fast-spiking interneurons. *J Neurosci*. 2010;30(41):13679-13689.
- 30 34. Parrish RR, Codadu NK, Racca C, Trevelyan AJ. Pyramidal cell activity levels affect the polarity of  
31 activity-induced gene transcription changes in interneurons. *Journal of neurophysiology*.  
32 2018;120(5):2358-2367.
- 33 35. Burman RJ, Calin A, Codadu NK, et al. Excitatory GABAergic signalling is associated with  
34 acquired benzodiazepine resistance in status epilepticus. *bioRxiv*. 2018;10.1101/478594v1.
- 35 36. Goodkin HP, Yeh JL, Kapur J. Status epilepticus increases the intracellular accumulation of  
36 GABAA receptors. *J Neurosci*. 2005;25(23):5511-5520.
- 37 37. Kapur J, Macdonald RL. Rapid seizure-induced reduction of benzodiazepine and Zn<sup>2+</sup> sensitivity  
38 of hippocampal dentate granule cell GABAA receptors. *J Neurosci*. 1997;17(19):7532-7540.
- 39 38. Dreier JP, Zhang CL, Heinemann U. Phenytoin, phenobarbital, and midazolam fail to stop status  
40 epilepticus-like activity induced by low magnesium in rat entorhinal slices, but can prevent its  
41 development. *Acta Neurol Scand*. 1998;98(3):154-160.
- 42 39. Voss LJ, Jacobson G, Sleigh JW, Steyn-Ross A, Steyn-Ross M. Excitatory effects of gap junction  
43 blockers on cerebral cortex seizure-like activity in rats and mice. *Epilepsia*. 2009;50(8):1971-  
44 1978.
- 45 40. Manjarrez-Marmolejo J, Franco-Perez J. Gap Junction Blockers: An Overview of their Effects on  
46 Induced Seizures in Animal Models. *Current neuropharmacology*. 2016;14(7):759-771.

- 1 41. Chang WP, Wu JJ, Shyu BC. Thalamic modulation of cingulate seizure activity via the regulation  
2 of gap junctions in mice thalamocingulate slice. *PLoS One*. 2013;8(5):e62952.
- 3 42. Parrish RR, Trevelyan AJ. Stress-testing the brain to understand its breaking points. *J Physiol*.  
4 2018;596(11):2033-2034.
- 5 43. Thompson SM, Gahwiler BH. Activity-dependent disinhibition. I. Repetitive stimulation reduces  
6 IPSP driving force and conductance in the hippocampus in vitro. *J Neurophysiol*.  
7 1989;61(3):501-511.
- 8 44. Isomura Y, Sugimoto M, Fujiwara-Tsukamoto Y, Yamamoto-Muraki S, Yamada J, Fukuda A.  
9 Synaptically activated Cl<sup>-</sup> accumulation responsible for depolarizing GABAergic responses in  
10 mature hippocampal neurons. *J Neurophysiol*. 2003;90(4):2752-2756.
- 11 45. Huberfeld G, Wittner L, Clemenceau S, et al. Perturbed chloride homeostasis and GABAergic  
12 signaling in human temporal lobe epilepsy. *J Neurosci*. 2007;27(37):9866-9873.
- 13 46. Dzhalal VI, Kuchibhotla KV, Glykys JC, et al. Progressive NKCC1-dependent neuronal chloride  
14 accumulation during neonatal seizures. *J Neurosci*. 2010;30(35):11745-11761.
- 15 47. Ledri M, Madsen MG, Nikitidou L, Kirik D, Kokaia M. Global optogenetic activation of inhibitory  
16 interneurons during epileptiform activity. *J Neurosci*. 2014;34(9):3364-3377.
- 17 48. Chang M, Dufour S, Carlen PL, Valiante TA. Generation and On-Demand Initiation of Acute Ictal  
18 Activity in Rodent and Human Tissue. *Journal of visualized experiments : JoVE*. 2019(143).
- 19 49. Schevon CA, Weiss SA, McKhann G, Jr., et al. Evidence of an inhibitory restraint of seizure  
20 activity in humans. *Nature communications*. 2012;3:1060.
- 21 50. Trevelyan AJ, Muldoon SF, Merricks EM, Racca C, Staley KJ. The role of inhibition in epileptic  
22 networks. *J Clin Neurophysiol*. 2015;32(3):227-234.
- 23 51. Magloire V, Cornford J, Lieb A, Kullmann DM, Pavlov I. KCC2 overexpression prevents the  
24 paradoxical seizure-promoting action of somatic inhibition. *Nature communications*.  
25 2019;10(1):1225.
- 26 52. Browne DL, Gancher ST, Nutt JG, et al. Episodic ataxia/myokymia syndrome is associated with  
27 point mutations in the human potassium channel gene, KCNA1. *Nat Genet*. 1994;8(2):136-140.
- 28 53. Eunson LH, Rea R, Zuberi SM, et al. Clinical, genetic, and expression studies of mutations in the  
29 potassium channel gene KCNA1 reveal new phenotypic variability. *Annals of neurology*.  
30 2000;48(4):647-656.
- 31 54. Muona M, Berkovic SF, Dibbens LM, et al. A recurrent de novo mutation in KCNC1 causes  
32 progressive myoclonus epilepsy. *Nat Genet*. 2015;47(1):39-46.

33



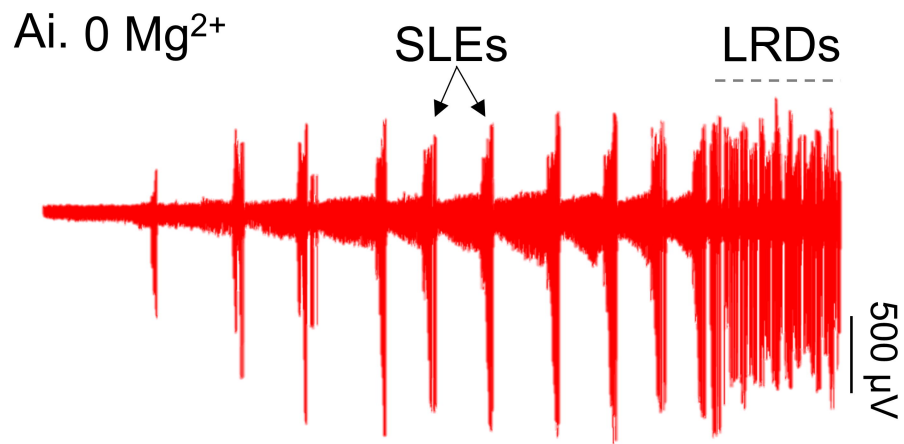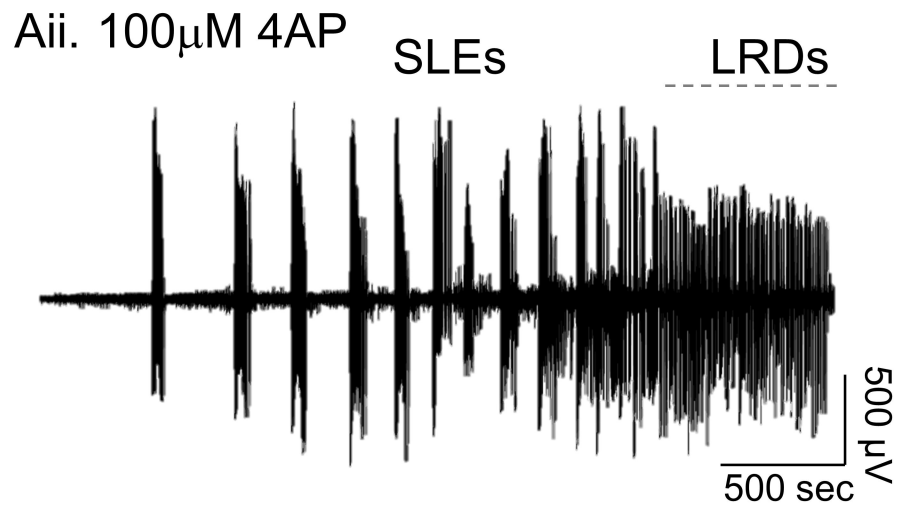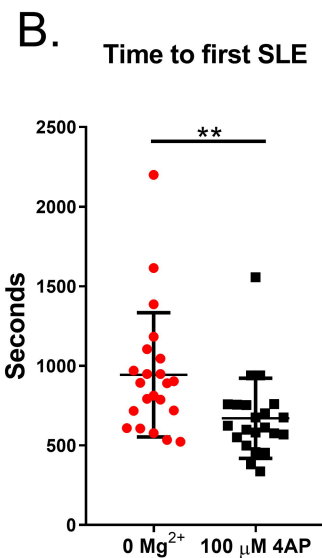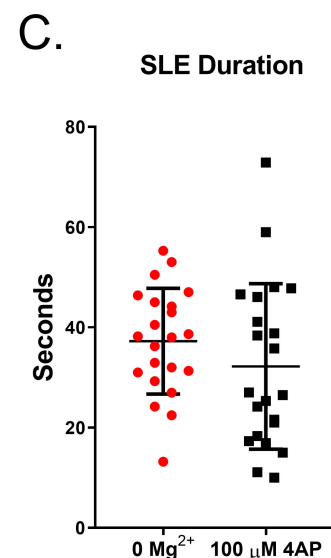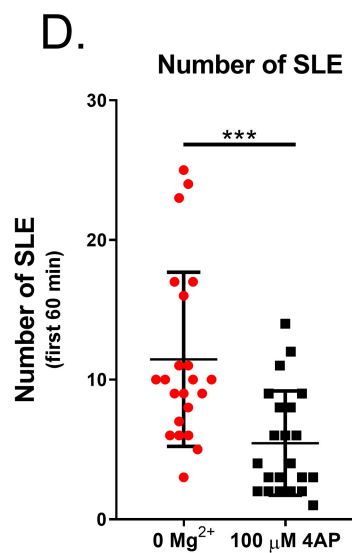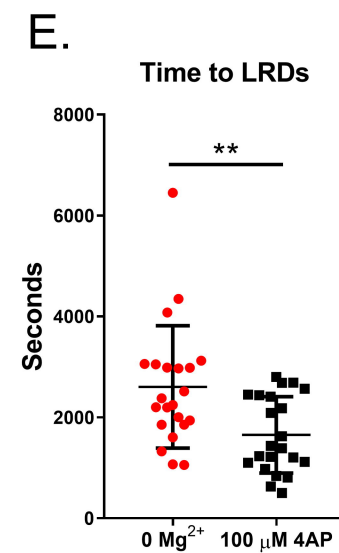

Ai. 0 Mg<sup>2+</sup>

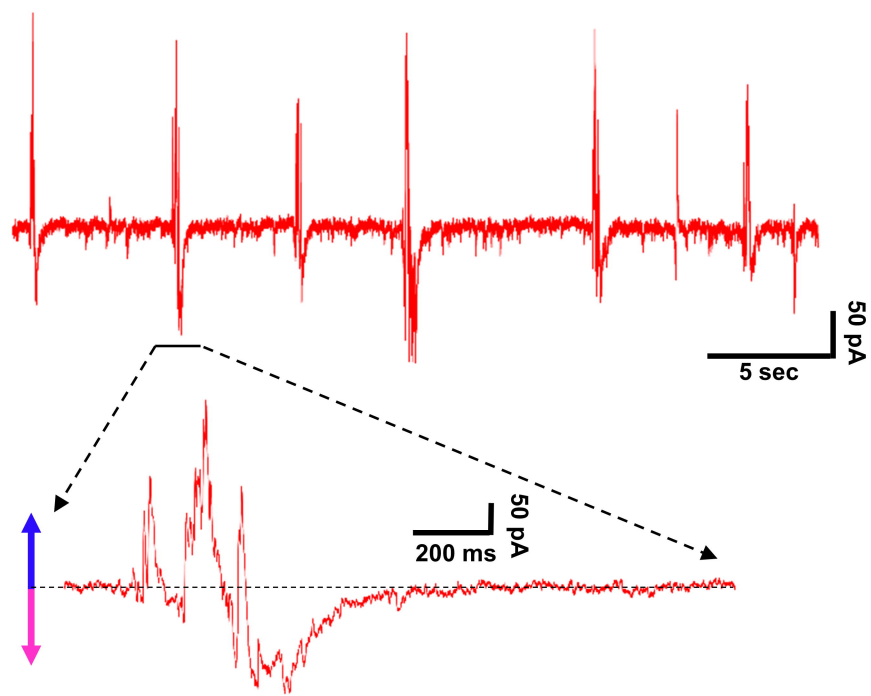

Bi. 4AP

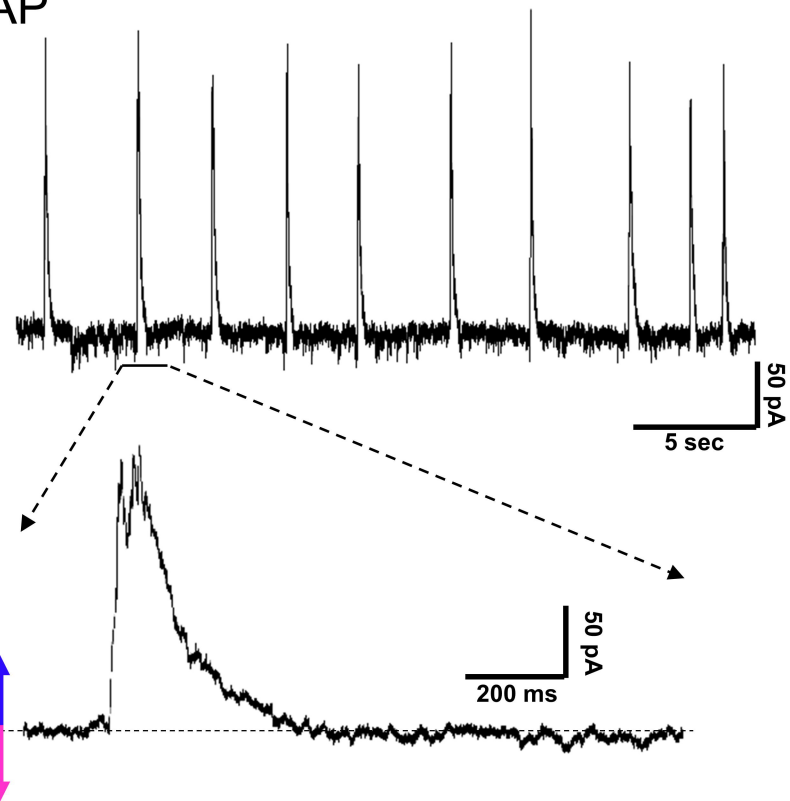

Aii.

0 Mg<sup>2+</sup> Early Interictal-like Events

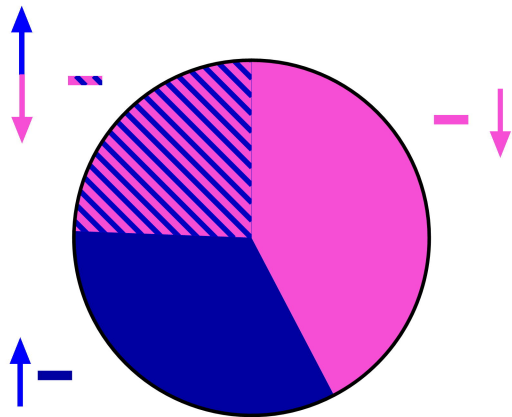

Bii.

4AP Early Interictal-like Events

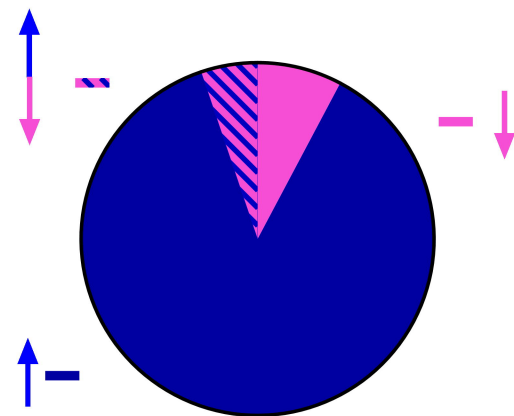

Ai. 0 Mg<sup>2+</sup>

Preictal period

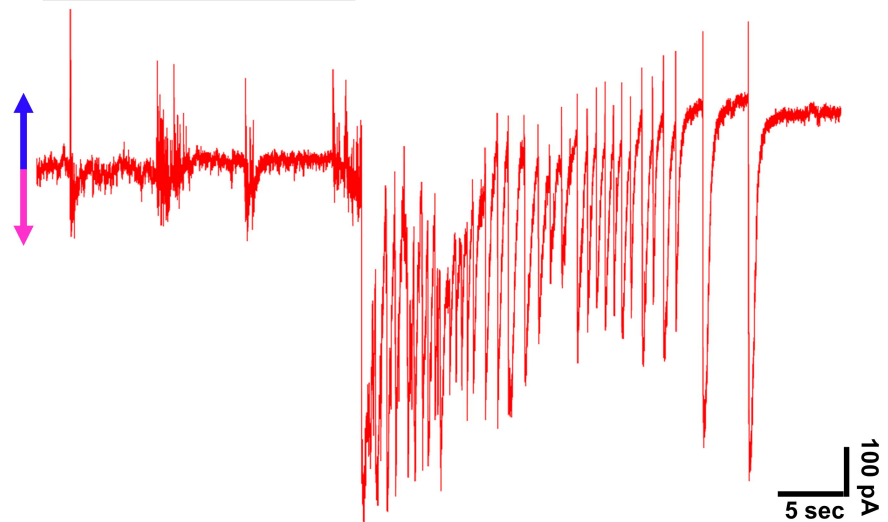

Bi. 4AP

Preictal period

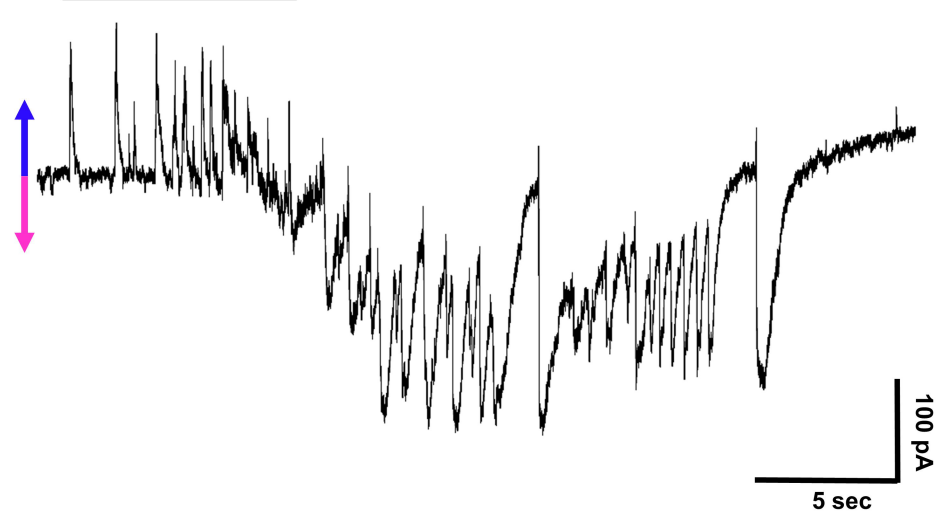

Aii.

0 Mg<sup>2+</sup> Preictal

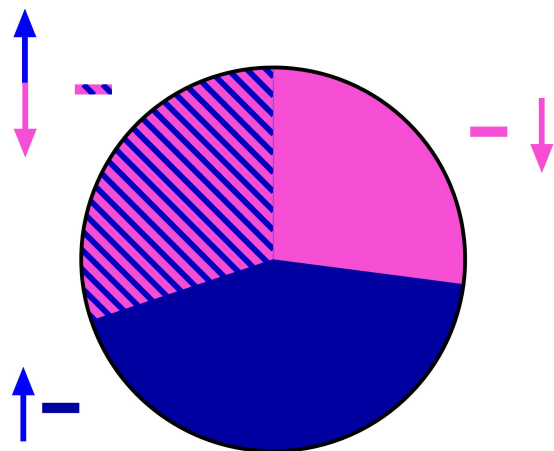

Bii.

4AP Preictal

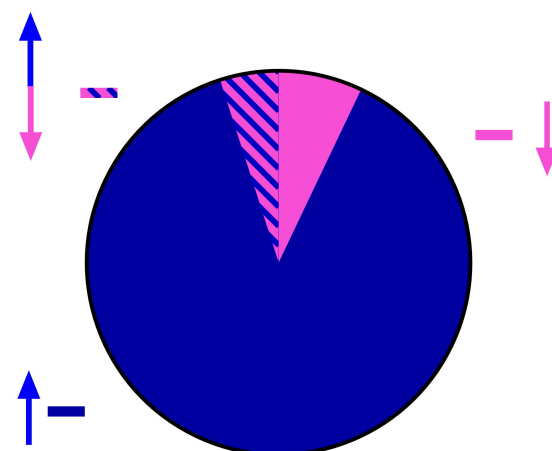

# A. 0 Mg<sup>2+</sup>

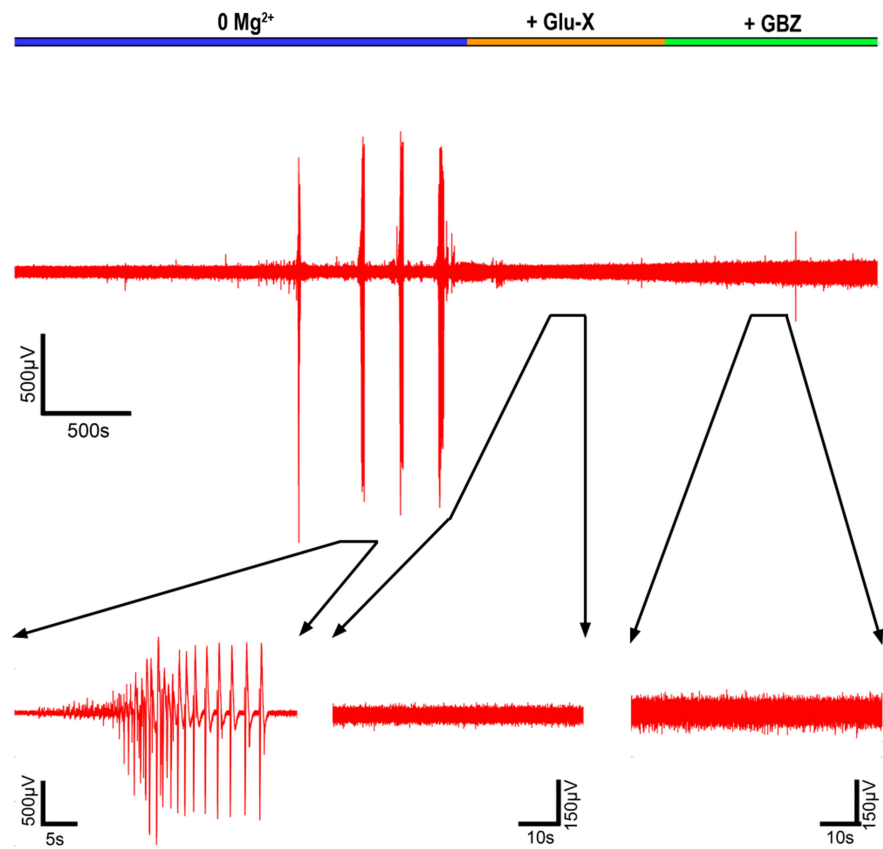

# B. 4AP

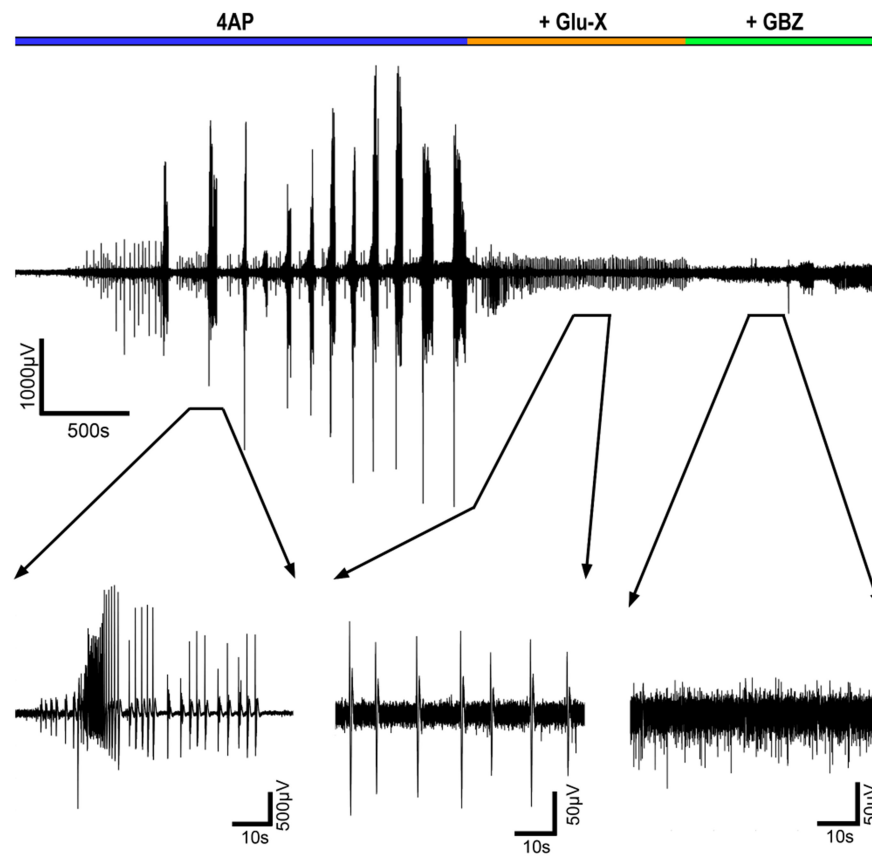

## A. Spontaneous activity in 4AP

### Ai. Pyramidal cells

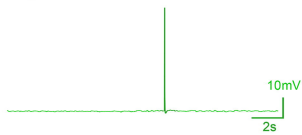

### Aii. Parvalbumin +ve interneurons

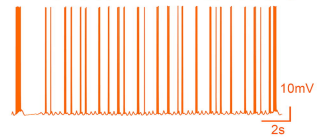

### Aiii. Somatostatin +ve interneurons

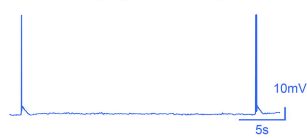

## C. Evoked activity

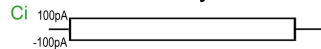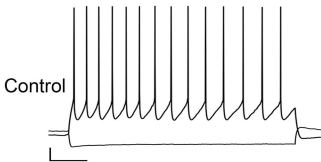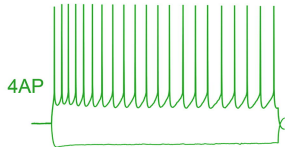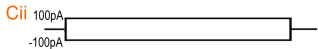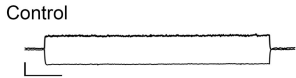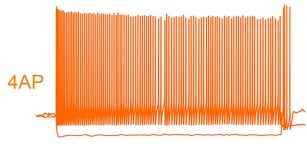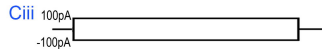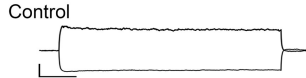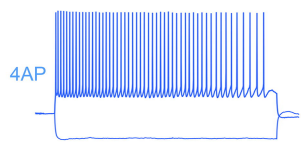

## B. Spontaneous: pooled data

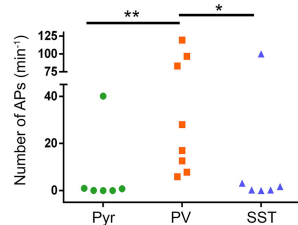

## D. Evoked: pooled data

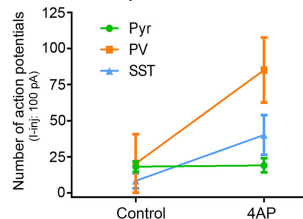

## A. Action potential half-width

### Ai. Pyramidal cells

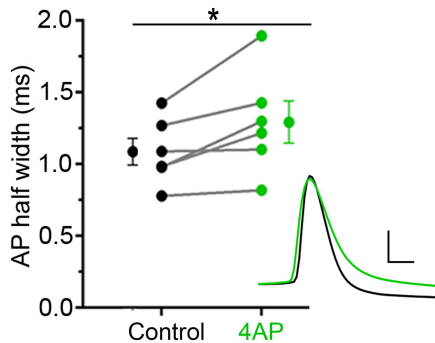

### Aii. PV +ve interneurons

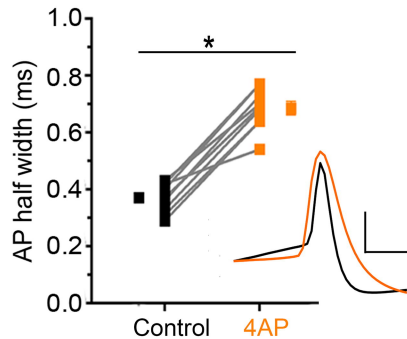

### Aiii. Sst+ve interneurons

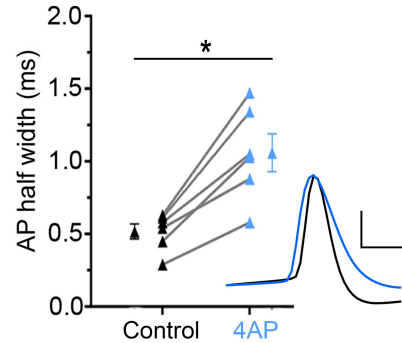

## B. AP threshold

### Bi

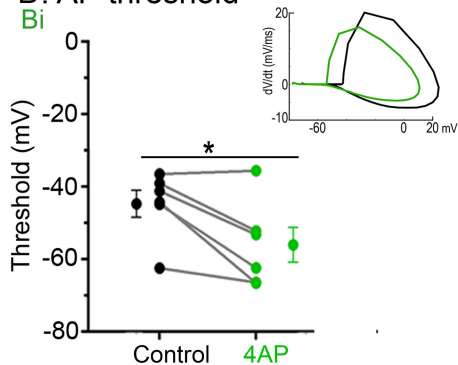

### Bii

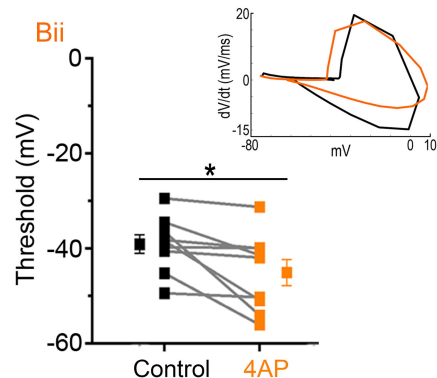

### Biii

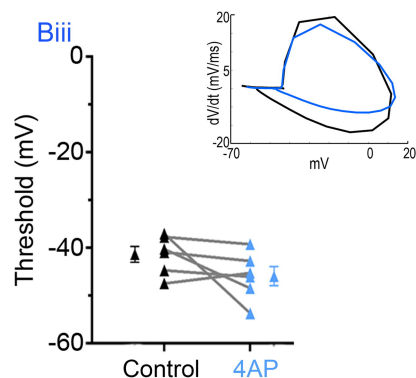

### A. 0 Mg<sup>2+</sup>

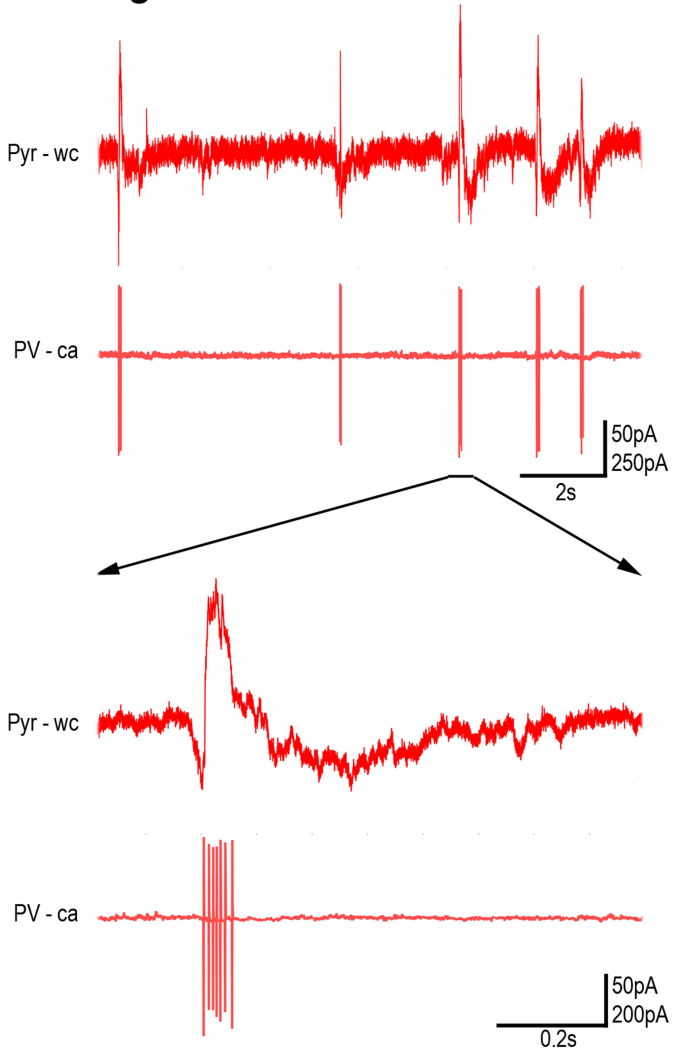

### B. 4AP

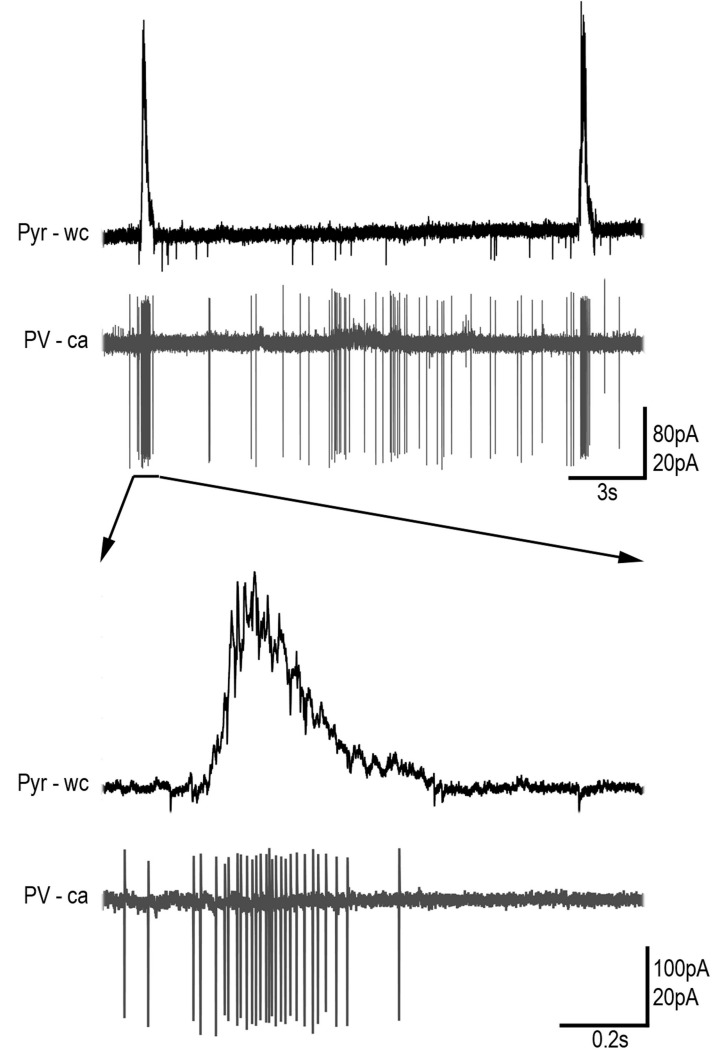

### C

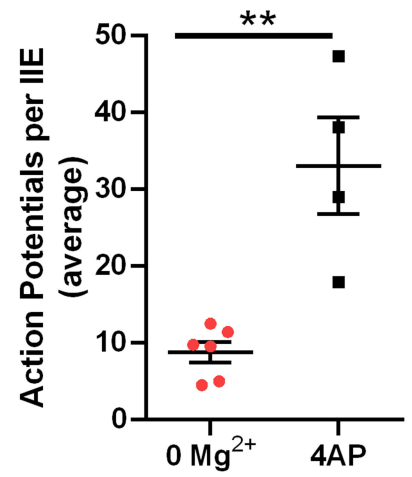

### D

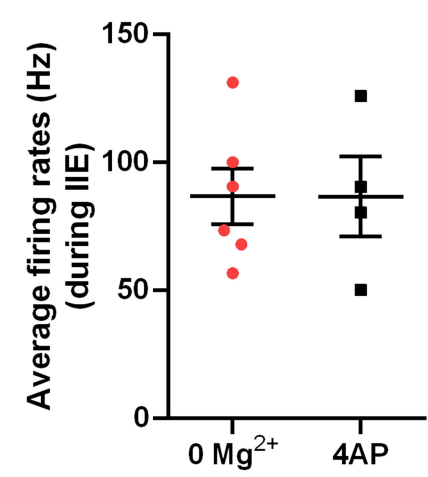

### E

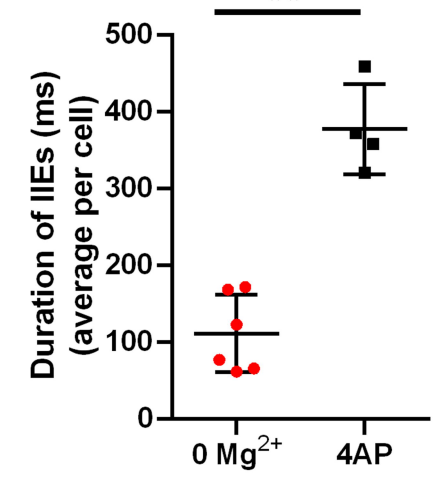

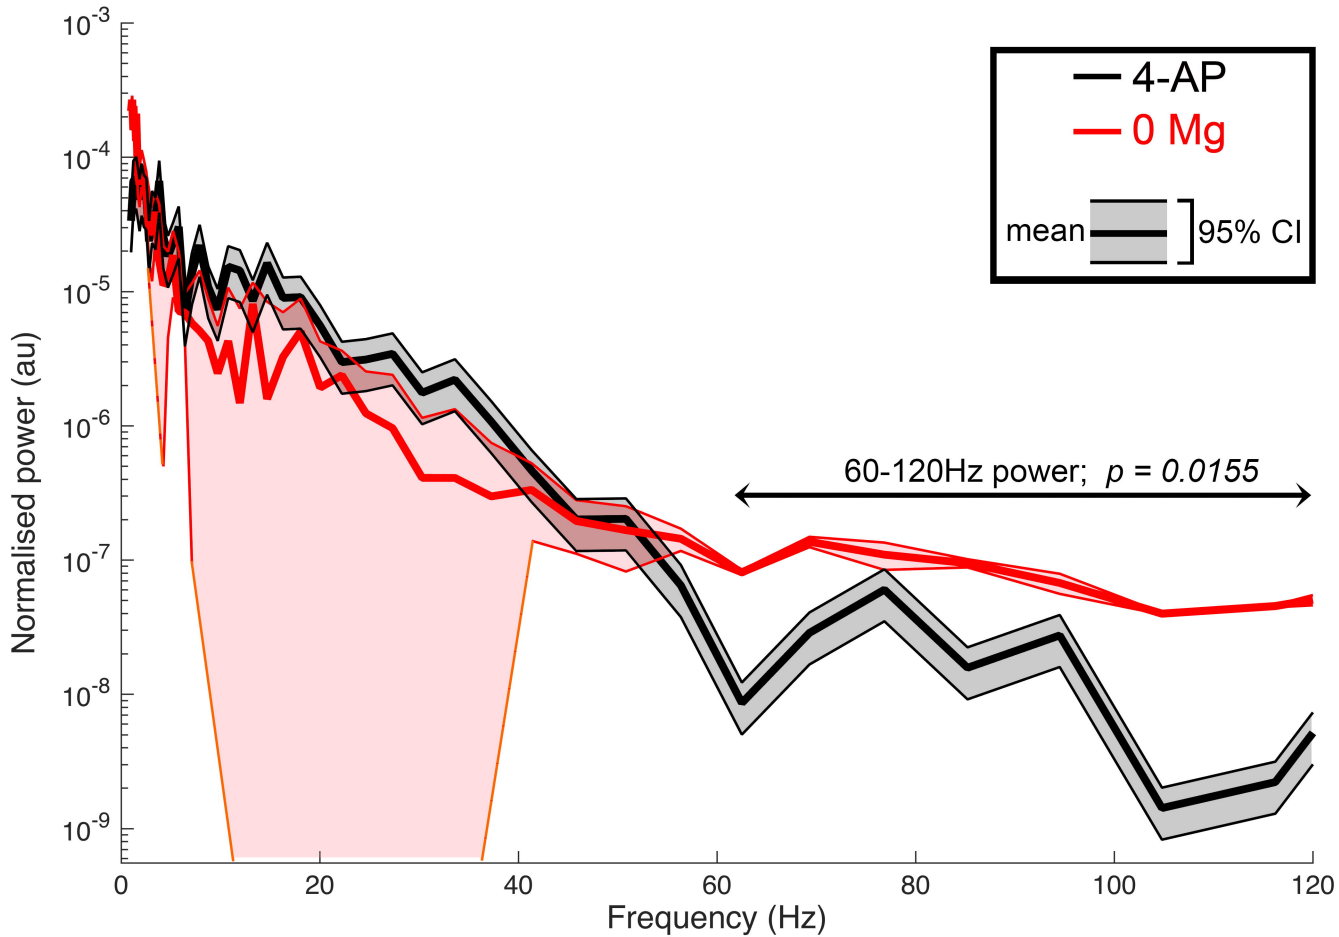



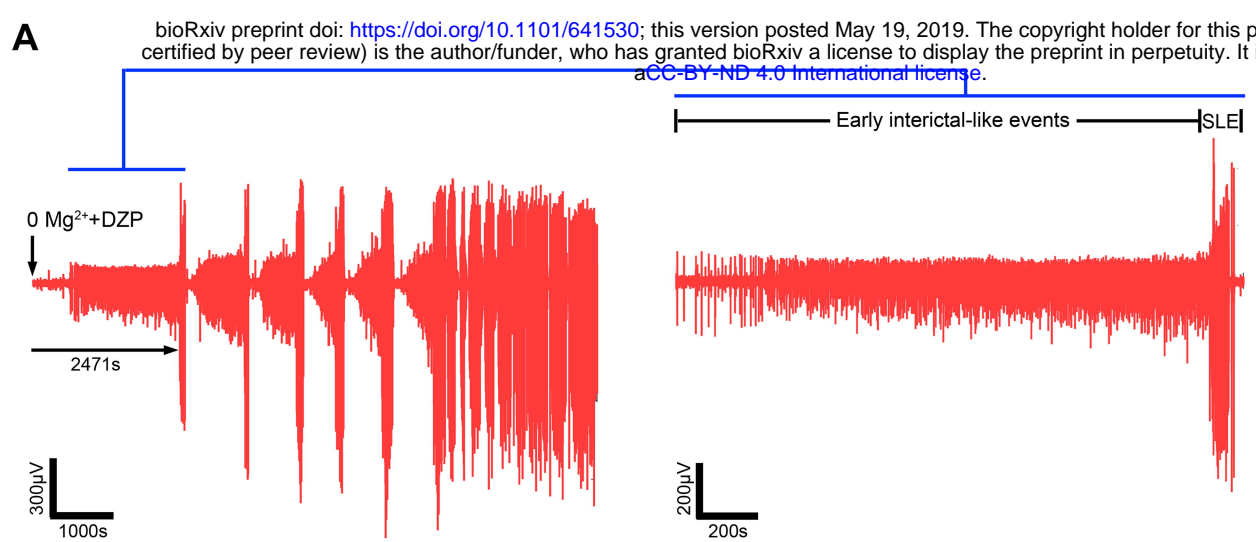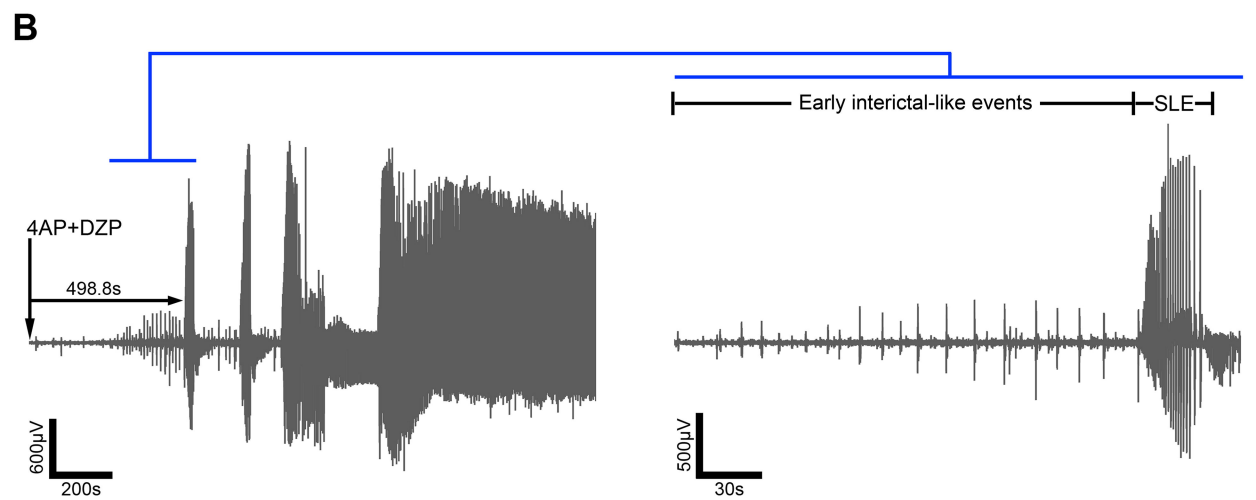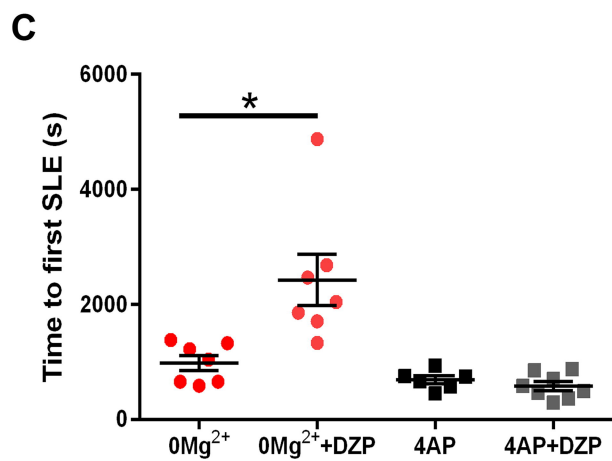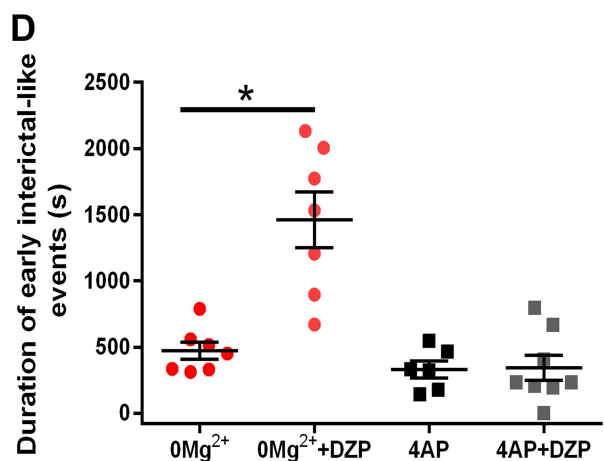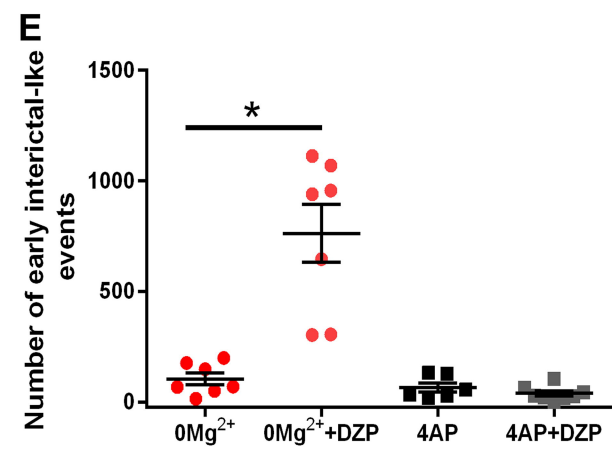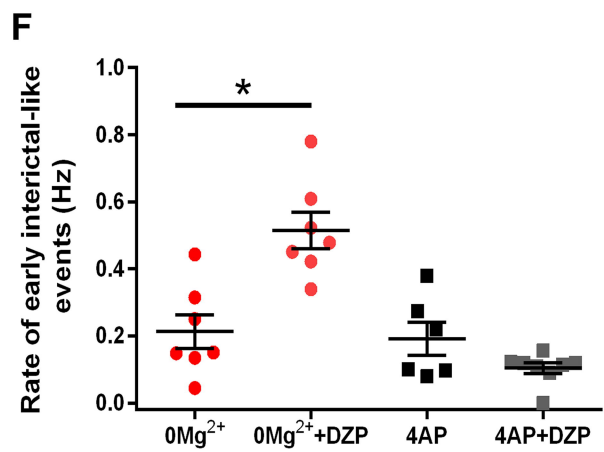

| Table 1                                     |                                  | Control      | 4AP          | % change | p-value |    |
|---------------------------------------------|----------------------------------|--------------|--------------|----------|---------|----|
| <b>Parvalbumin +ve interneuron (n = 9)</b>  | Resting Em (mV)                  | -63.8 ± 2.1  | -62.4 ± 2.5  | -2.2     | 0.205   | ns |
|                                             | Rin (MΩ)                         | 114.5 ± 11.9 | 131.7 ± 12.1 | 15.5     | 0.002   | ** |
|                                             | AP threshold (mV)                | -39.1 ± 1.8  | -45.1 ± 2.6  | 15.3     | 0.021   | *  |
|                                             | AP threshold (mV) relative to Em | 24.8 ± 3.3   | 17.5 ± 4.3   | -29.4    | 0.014   | *  |
|                                             | Half-width (ms)                  | 0.37 ± 0.02  | 0.68 ± 0.02  | 83.8     | < 0.001 | ** |
| <b>Somatostatin +ve interneuron (n = 6)</b> | Resting Em (mV)                  | -64.6 ± 1.9  | -63.9 ± 2.3  | -1.1     | 0.671   | ns |
|                                             | Rin (MΩ)                         | 224.9 ± 48.4 | 251.5 ± 51.2 | 11.8     | 0.057   | ns |
|                                             | AP threshold (mV)                | -41.4 ± 1.5  | -45.9 ± 1.8  | 10.9     | 0.158   | ns |
|                                             | AP threshold (mV) relative to Em | 23.1 ± 2.9   | 18.1 ± 2.1   | -21.6    | 0.233   | ns |
|                                             | Half-width (ms)                  | 0.52 ± 0.05  | 1.06 ± 0.12  | 103.8    | 0.002   | ** |
| <b>Pyramidal cell (n = 6)</b>               | Resting Em (mV)                  | -72.2 ± 1.8  | -75.3 ± 3.4  | 4.3      | 0.374   | ns |
|                                             | Rin (MΩ)                         | 163.1 ± 23.6 | 176.1 ± 17.3 | 8.0      | 0.418   | ns |
|                                             | AP threshold (mV)                | -44.8 ± 3.4  | -56.1 ± 4.4  | 25.2     | 0.023   | *  |
|                                             | AP threshold (mV) relative to Em | 27.4 ± 1.8   | 19.3 ± 2.4   | -29.6    | 0.02    | *  |
|                                             | Half-width (ms)                  | 1.09 ± 0.09  | 1.29 ± 0.13  | 18.3     | 0.033   | *  |
